# Supplementary material for: The formation of a single-bonded (C70−)2dimer in a new ionic multicomponent complex of cyclotriveratrylene: (Cs+)2(C70−)2·CTV·(DMF)7(C6H6)0.75
Source: Royal Society of Chemistry journal article supplement (doi:10.1039/b207035a), 2002-01-01
Supplement: b207035a.doc [file b207035a.doc]

**Supporting information.**

*Materials*: CTV was purchased in Acros. C70 of 99.0 % purity was used from MTR Ltd.. n-Hexane and benzene (C6H6) was doubly distilled over Na/benzophenon in the argon atmosphere. *N,N*-dimethylformamide (DMF) of HPLC grade (Aldrich) was distilled under vacuum before using. The solvents were degassed and were put into the glove box.

*General:* All manipulation on the synthesis and the isolation of the crystals were carried out in the glove box MBraun 150B-G with controlled atmosphere and the content of H2O and O2 less than 1 ppm. UV-visible-NIR spectra were measured on Shimadzu-3100 spectrometer in 240-2600 nm range. FT-IR spectra were measured in KBr pellets with a Perkin-Elmer 1000 Series spectrometer (400-7800 cm-1). The preparation of KBr pellets for IR and UV-visible-NIR measurements were carried out in the glove box. Magnetic susceptibility measurements were carried out with a Quantum Design MPMS-XL SQUID magnetometer at a magnetic field of 1000 G between 1.9 and 390 K in zero-field and field (1000 G) cooling conditions. The magnetic data were corrected for the sample holder contribution. The measurement of the samples from two different syntheses gave identical temperature dependencies. A JEOL JES-TE 200 X-band EPR spectrometer equipped with an Oxford Instruments EPR-910 cryostat was used to measure the EPR spectra between 4 and 300 K. For EPR- and SQUID- measurements the crystals were loaded into the quarts tube of 2 mm diameter in the glove box and sealed under 10-5 torr vacuum.

*Synthesis.* (Cs+)2(C70-)2CTV(DMF)5C6H6 (**1**) has been obtained by a diffusion. C70- is generated in *N,N*-demethylformamide (DMF) solution by the reduction of C70 (20 mg, 0.024 mmol) with Cs (4.3 mg, 0.0264 mmol) (C70:Cs were in 1:1.1 molar ratio). The formation of C70- radical anions only is confirmed by NIR-spectroscopy. The solution containing Cs+ and C70- was cooled, filtered, mixed with benzene (benzene/DMF volume ratio is 7:1) and was used to dissolve CTV (43.2 mg, 0.096 mmol) (4-fold molar excess relative to C70). Hexane was layered over obtained solution in a glass tube of 1.5 cm diameter with a ground glass plug. The solvent was decanted from the crystals precipitated after 1 month, and they were washed with hexane giving large hexagonal plates (up to 22 mm) of **1** with 40% yield. The composition of **1** was determined according to the X-ray diffraction data.

IR-spectra.

IR spectrum of **1**.

(C70-)2 dimer: 494, 508, 530, 548, 556, 575, 628, 668, 681, 713, 721, 774, 800, 1175, 1278, 1307, 1323, 1353, 1363, 1393 1429, 1540, 1557 cm-1;

CTV: 618, 740, 842, 875, 901, 923, 943, 991, 1033, 1086 (+DMF), 1144, 1195, 1218, 1258 (+DMF) , 1438, 1509, 1608 cm-1;

DMF: 1664, 1652, 1258(+CTV), 1086 (+CTV), 660 cm-1.

IR spectra of parent compounds.

C70 fullerene: 457, 534, 564, 576, 642, 673, 794, 1132, 1413, 1430 cm-1;

CTV:619, 741, 847, 882, 904, 943, the doublet at 984 and 997, 1027, 1089, 1147, 1196, 1222, the doublet at 1262 and 1274, 1440, 1448, 1458, 1512, 1609 cm-1;

DMF: 658, 1093, 1257, 1388, 1438, 1507, 1676 cm-1.

Visible-NIR spectrum of 1: the bands at 910 and 1240 nm

*X-ray Crystallography*

Single-crystal X-ray diffraction experiment for **1** was carried out with a Bruker SMART 1K CCD area detector mounted on a 3-circle diffractometer, using graphite monochromated Mo-K radiation (=0.71073 Å). The data collection nominally covered over a hemisphere of reciprocal space by a combination of two sets of  scans (each scan 0.3), each set at different  angles. Low temperature of the experiments was maintained with a Cryostream (Oxford Cryosystems) open-flow N2 gas cryostat. Reflections intensities were integrated using SAINT software 1 and corrected for absorption by semi-empirical method (SADABS program2) based on multiple measurements of identical reflections and Laue equivalents. Ratio of minimum and maximum transmission coefficients is 0.684.

The structure was solved by direct method and was refined by full-matrix least squares against *F2* of all data, using SHELXTL software.3 Crystallographically independent part of the structure **1** consist of four Cs+ cations, two cyclotriveratrylene molecules, two (C70-)2 dimers, fourteen DMF molecules and one and a half benzene molecules. This gives the structural formula of the complex **1** as (Cs+)4[(C70-)2]2 (CTV)2·(DMF)14·(C6H6)1.5.

All non-hydrogen atoms of ordered fragments were refined in anisotropic approximation. One of two crystallographycally independent (C70-)2 dimers (**B**), three DMF and one benzene molecules are disordered. For the disordered (C70-)2 dimer (**B**) the positions of carbon atoms (excepting two carbons involved in the intercage C-C bond) were refined using rigid body constrains according to the data for the neutral C70 molecule.4  The values of 0.75 and 0.64 for site occupations of major positions of C70 fullerides in the dimer **B** were reached during refinement procedure. Three DMF molecules are disordered on to the sites with equal probabilities. Positions of hydrogen atoms were calculated and included in refinement procedure using riding model.

*Crystal data*: C385H167Cs4N14O26, Mr=5935.97, dark red plate, crystal size 0.60.250.10 mm-3, monoclinic, space group P21/n, a=25.937(8), b= 29.113(11), c= 34.221(14) Å, = 103.328(9)o, V=25114(16) Å3, *D*c=1.568 gcm-1, Z=4, *T*=120(2) K, absorption coefficient 0.661 mm-1, and F(000)= 12012. 66704 reflections were collected, of which 42508 independent reflection (Rint =0.0624) were included into the fullcycle refinement of the structure with 2788 parameters and 1740 restraints: *R*1=0.23 against F, *wR*2= 0.346 against F2 for all data, conventional *R*1=0.104 against F, *wR*2= 0.262 against F2 computed for 14170 observed data with *I*>2(*I*), the amplitudes of residual electron density are +2.62 and -0.62 near Cs+ cations, and GOF=0.872.

**References.**

1. *SMART and SAINT, Release 5.0, Area detector control and integration software.*

Bruker AXS, Analitical X-Ray Instruments, Madison, Wisconsin, USA, 1998.

2. G. M. Sheldrick, *SADABS: A program for exploiting the redundancy of area-detector*

*X-ray data*; University of Göttingen: Göttingen, Germany, 1999.

3. G. M. Sheldrick, *SHELXTL,* Version 5.1; Bruker AXS, Inc., Madison, Wisconsin, USA, 1997.

4 S.I. Troyanov, *Russ. J. Inorg. Chem*., 2001, **46**, 1612.
